# Supplementary material for: Orbital excitation blockade and algorithmic cooling in quantum gases
Source: Springer Nature journal article supplement (doi:10.1038/nature10668), 2011-12-01
Supplement: 41586_2011_BFnature10668_MOESM80_ESM.pdf [file 41586_2011_BFnature10668_MOESM80_ESM.pdf]

**Supplementary Table 1**

| $\Delta\omega_z/2\pi$ (Hz) | $n = 1$ | $n = 2$ | $n = 3$ | $n = 4$ |
|----------------------------|---------|---------|---------|---------|
| $m = 0$                    | 0       | -217    | -434    | -651    |
| $m = 1$                    | -9      | -226    | -443    |         |
| $m = 2$                    | -18     | -235    |         |         |
| $m = 3$                    | -27     |         |         |         |

Frequency shifts in Hz for a transition transferring an atom from the ground band to the fourth band, starting with  $n$  and  $m$  atoms in each of these bands. The shifts are measured relative to an initial state with one atom in the ground band and none in the excited band.
